# Supplementary material for: Alleviating effect of selenium-enrichedLactobacillus plantarum6076 on dextran sulfate sodium-induced colitis and liver inflammation in mice
Source: Royal Society of Chemistry journal article supplement (doi:10.1039/d3fo03842d), 2023-01-01
Supplement: d3fo03842d1.pdf [file d3fo03842d1.pdf]

Table S1: Disease Activity Index Scoring Chart

| Score | Weight Loss (%) | Stool Consistency | Bleeding          |
|-------|-----------------|-------------------|-------------------|
| 0     | 0               | Normal            | Negative          |
| 1     | 1-5             | Normal            | Negative          |
| 2     | 5-10            | Loose             | Occult blood      |
| 3     | 10-15           | Loose             | Occult blood      |
| 4     | ≥15             | Watery            | Macroscopic blood |

Table S2: Primer Sequence List

| Gene                        | Direction | Primer sequence           |
|-----------------------------|-----------|---------------------------|
| GAPDH                       | F         | ATGTGTCCGTCGTGGATCTGAC    |
| GAPDH                       | R         | AGACAACCTGGTCCTCAGTGTAG   |
| TNF- $\alpha$               | F         | GGCAGGTCTATTTGGAGTCATTG   |
| TNF- $\alpha$               | R         | ACATTCGAGGCAGTGAATTCGG    |
| IL-1 $\beta$                | F         | TCGCAGCAGCACATCAACAAGAG   |
| IL-1 $\beta$                | R         | TGCTCATGTCCTCATCCTGGAAGG  |
| IL-6                        | F         | CGGAGAGGAGACTTCACAGAG     |
| IL-6                        | R         | CATTTCCACGATTTCCCAGA      |
| IL-18                       | F         | GTGAACCCCAGACCAGACTG      |
| IL-18                       | R         | CCTGGAACACGTTTCTGAAAGA    |
| NF- $\kappa$ $\beta$        | F         | GAAATTCCTGATCCAGACAAAAC   |
| NF- $\kappa$ $\beta$        | R         | ATCACTTCAATGGCCTCTGTGTAG  |
| I $\kappa$ $\beta$ $\alpha$ | F         | ATGAGCAGAGGCTGGAGAG       |
| I $\kappa$ $\beta$ $\alpha$ | R         | TTAGCTCCAGGAGGGTTTGA      |
| p65                         | F         | CTTCCTCAGCCATGGTACCTCT    |
| p65                         | R         | CAAGTCTTCATCAGCATCAAACCTG |
